# Supplementary material for: Constitutive phosphorylated STAT3-associated gene signature is predictive for trastuzumab resistance in primary HER2-positive breast cancer
Source: Springer Nature journal article supplement (doi:10.1186/s12916-015-0416-2), 2015-07-31

# CONSORT Diagram for the fin-her trial

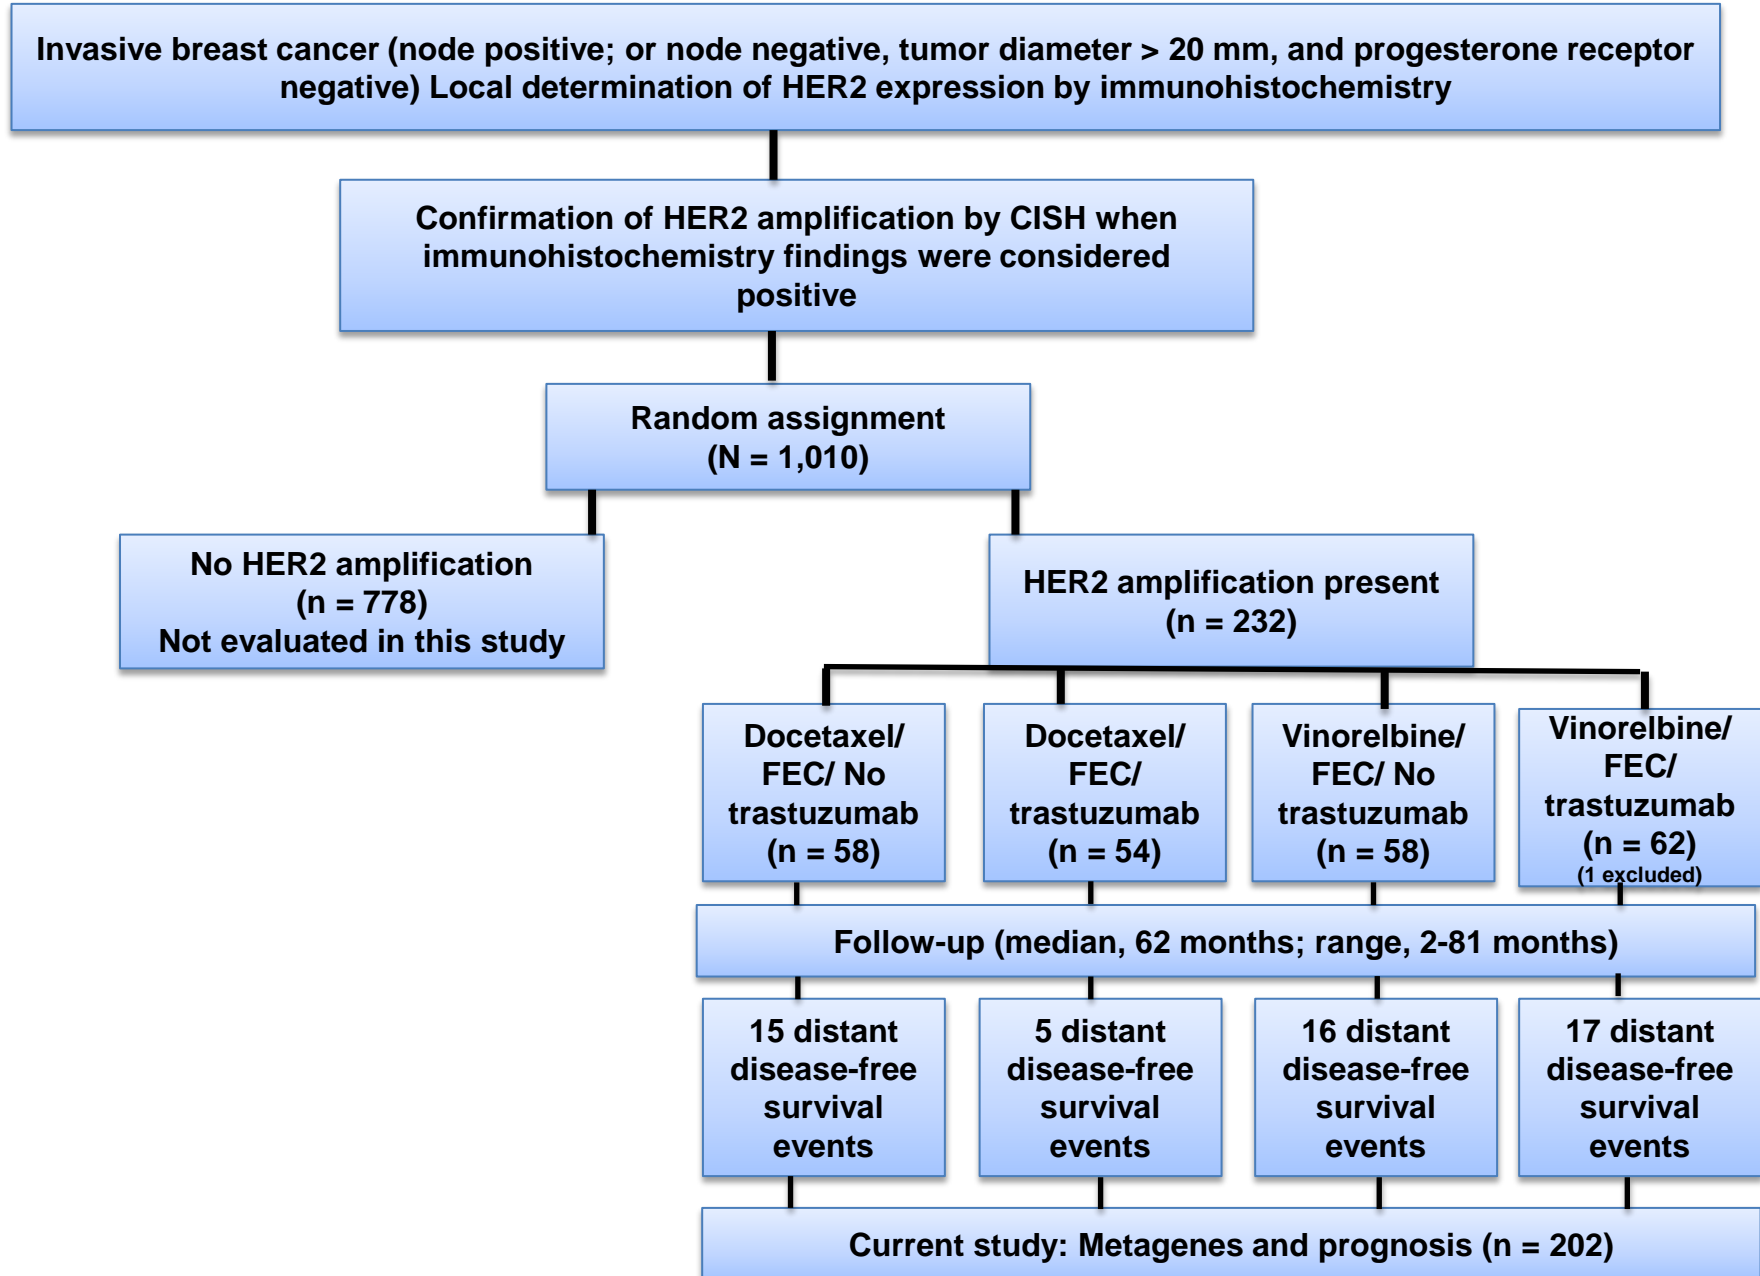

Supplement: MOESM2 [file 9758982]
