# Supplementary material for: Constitutive phosphorylated STAT3-associated gene signature is predictive for trastuzumab resistance in primary HER2-positive breast cancer
Source: Springer Nature journal article supplement (doi:10.1186/s12916-015-0416-2), 2015-07-31

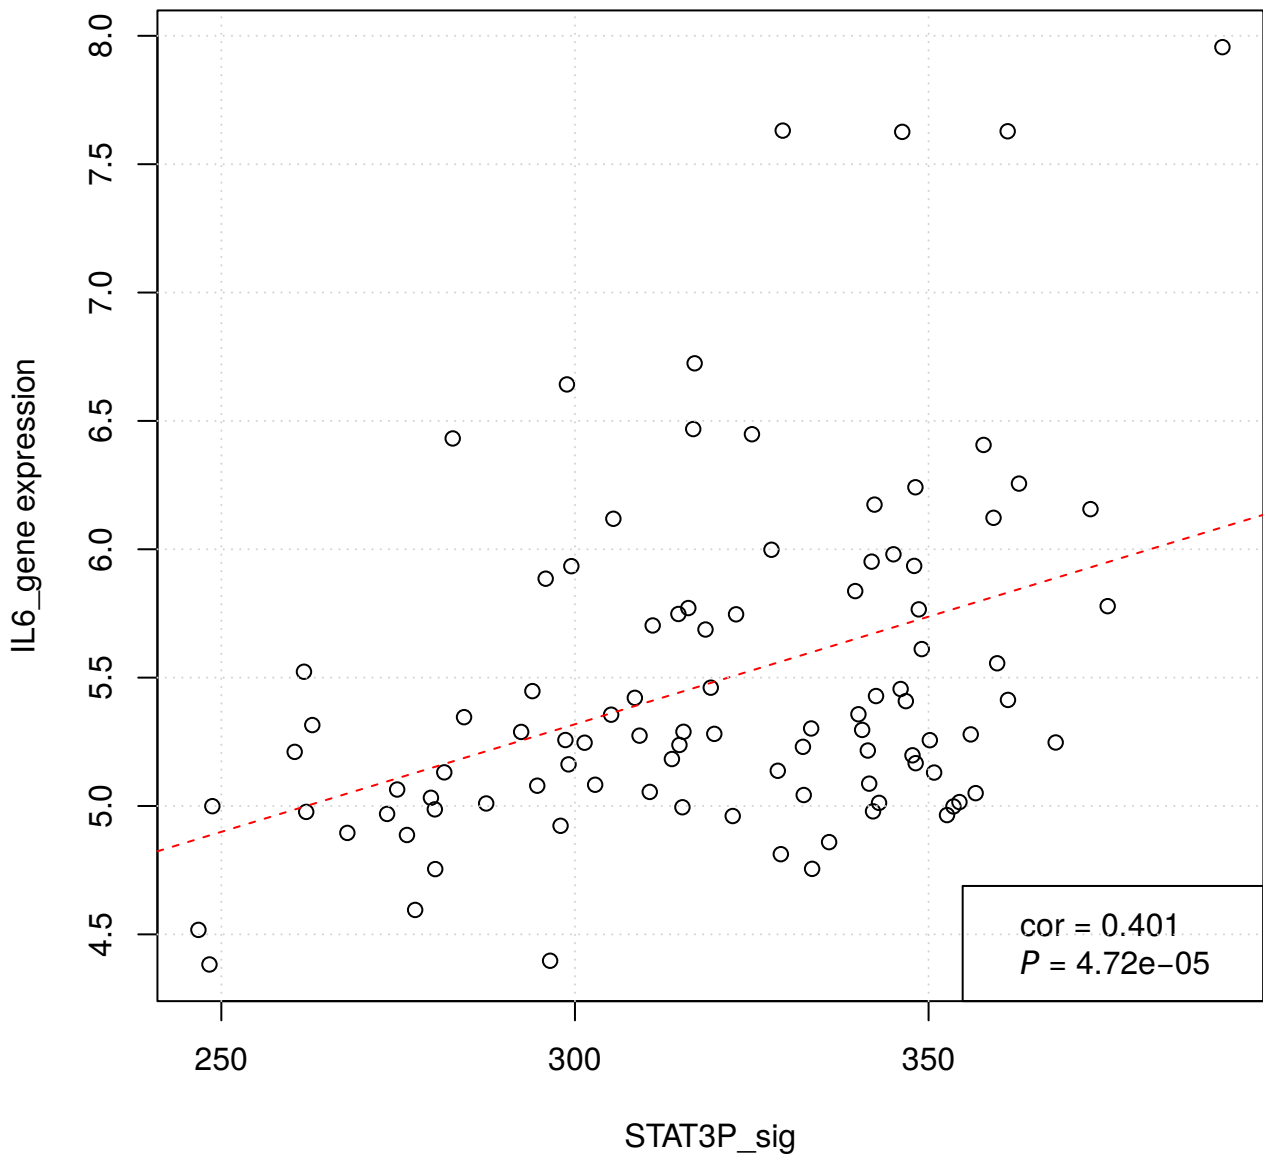

Supplement: MOESM8 [file 9758982]
